# Supplementary material for: Crosstalk between regulatory elements in disordered TRPV4 N-terminus modulates lipid-dependent channel activity
Source: PubMed Central journal article supplement (PMC10344929; doi:10.1038/s41467-023-39808-4), 2023-07-13
Supplement: 41467_2023_39808_MOESM3_ESM.pdf [file 41467_2023_39808_MOESM3_ESM.pdf]

## **Description of Additional Supplementary Files**

**Supplementary Data 1:** Summary of HDX-MS analyses and full list of the peptides obtained for different TRPV4 protein constructs.

**Supplementary Data 2:** Peptides analyzed by HDX-MS mapped on TRPV4-NTD sequence.

**Supplementary Data 3:** Summary of XL-MS analyses

**Supplementary Movie 1:** Atomistic MD simulation of core *G. gallus* TRPV4 ion channel in a lipid membrane

**Supplementary Movie 2:** Ensemble of TRPV4 IDR structures from MARTINI Simulations on the membrane, side view.

**Supplementary Movie 3:** Ensemble of TRPV4 IDR structures from MARTINI Simulations on the membrane, view from the cytosol.
