# Supplementary material for: Crosstalk between regulatory elements in disordered TRPV4 N-terminus modulates lipid-dependent channel activity
Source: PubMed Central journal article supplement (PMC10344929; doi:10.1038/s41467-023-39808-4), 2023-07-13

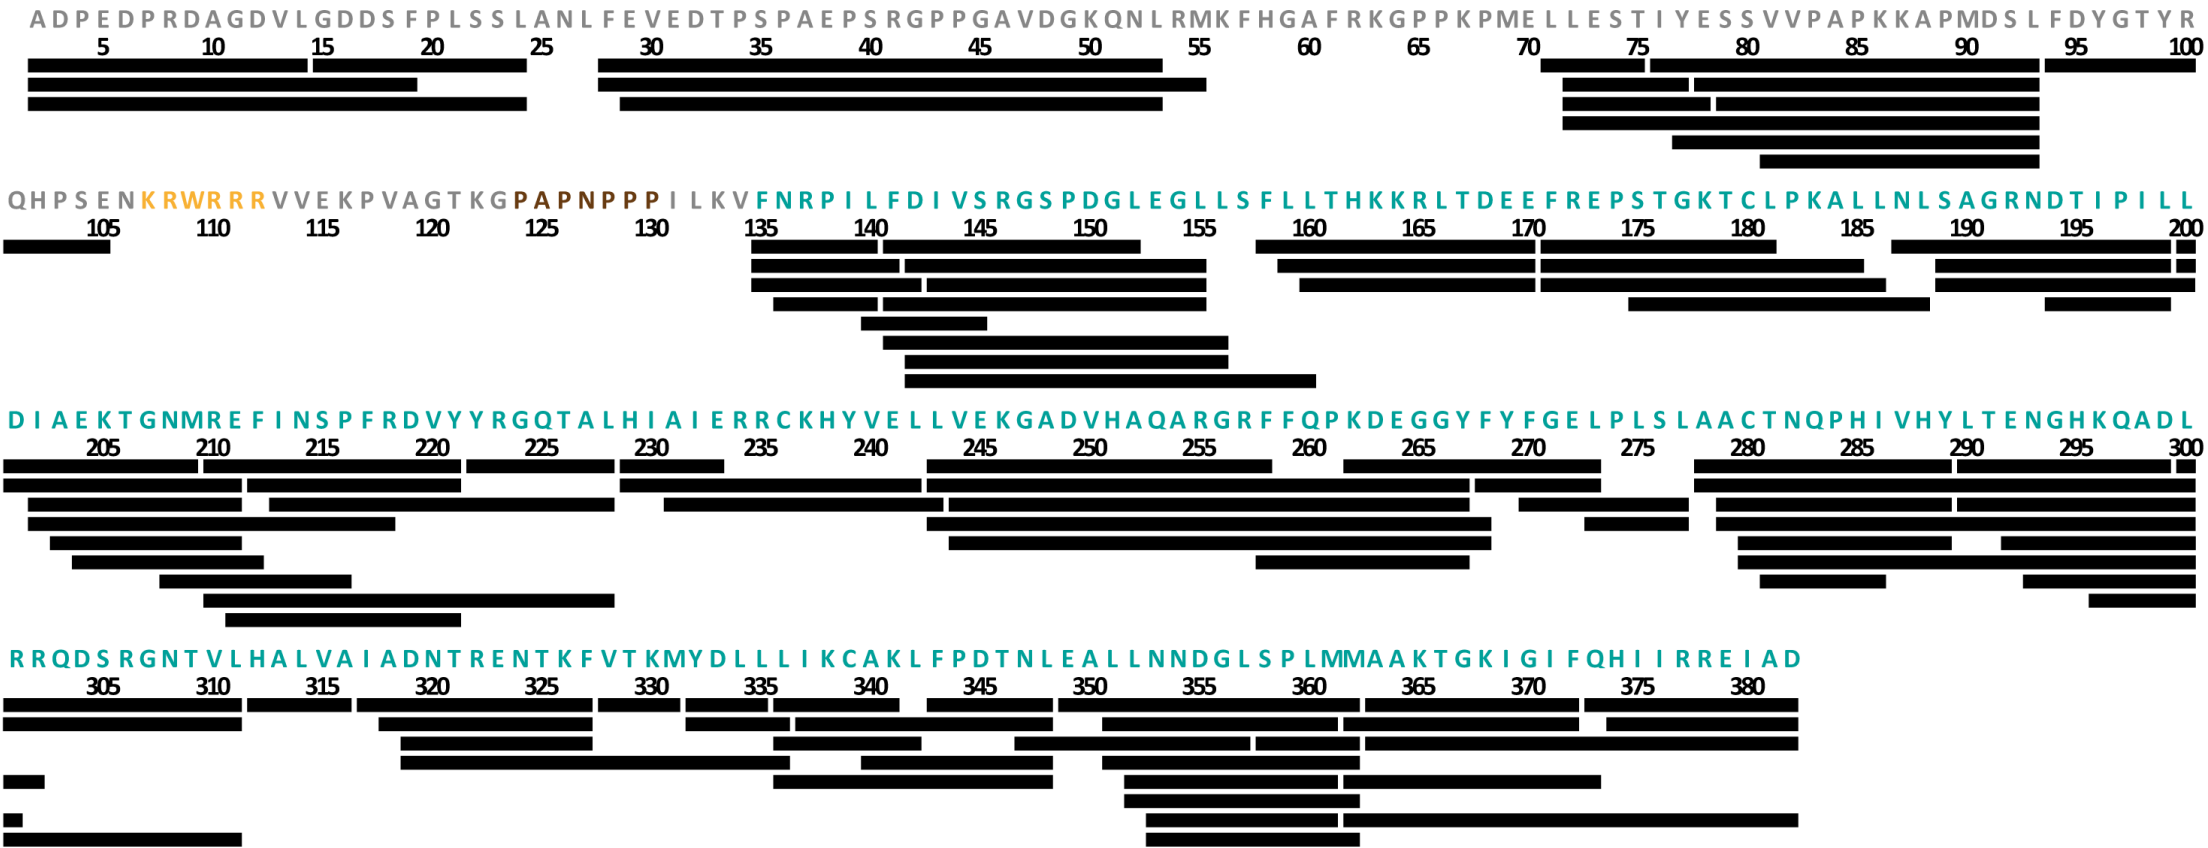

Supplement: 41467_2023_39808_MOESM5_ESM.pdf [file 41467_2023_39808_MOESM5_ESM.pdf]
